# Supplementary material for: Assessing the drought resilience of different land management scenarios using a tracer-aided ecohydrological model with variable root uptake distributions
Source: Copernicus journal article supplement (doi:10.5194/egusphere-2025-2533), 2025-06-26
Supplement: Supplementary file 1 [file egusphere-2025-2533-supplement.pdf]

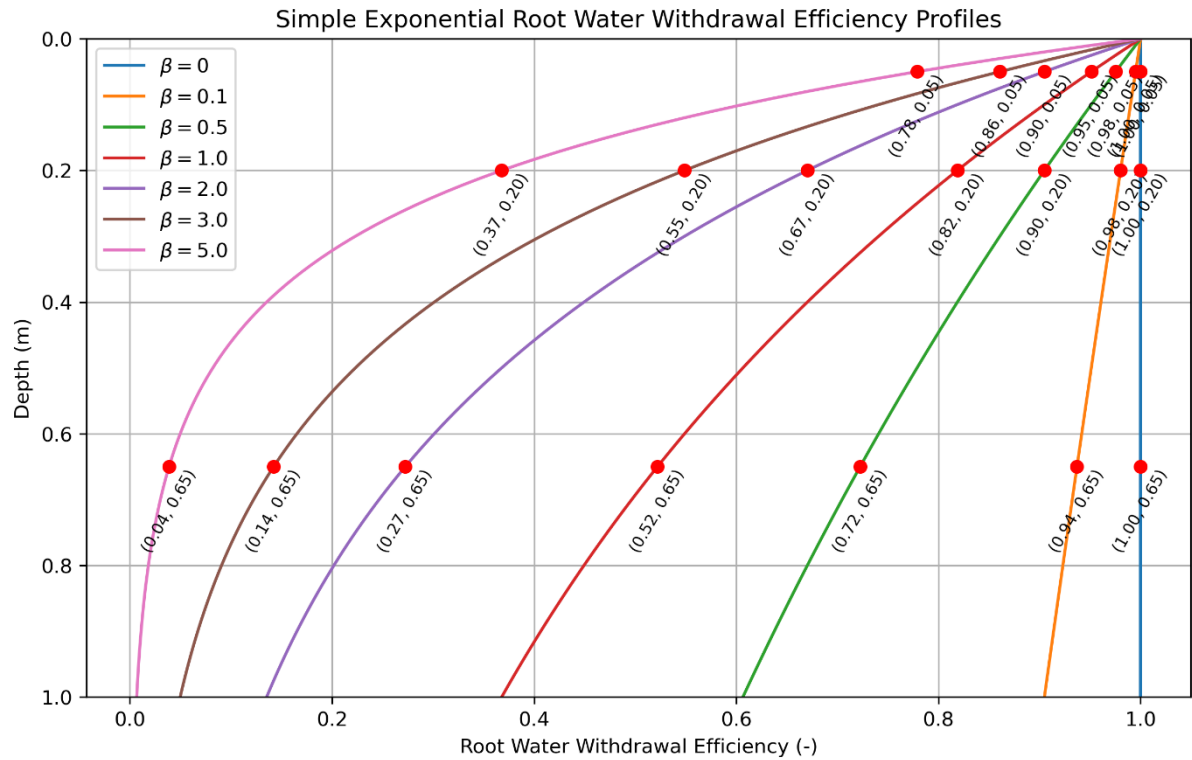

**Figure S1.** Exponential root water withdrawal efficiency function and profiles for different  $\beta$  values.  $\beta = 0$  represents a deep-rooted system, while a larger  $\beta$  indicates a shallow-rooted system with root activity concentrated near the surface.

**Table S1.** Soil Moisture Measurement Devices and Aggregation Methods

| Land Use Type   | Device Type                   | Measurement Depths (cm)         | Frequency           | Aggregation Method                                                                  |
|-----------------|-------------------------------|---------------------------------|---------------------|-------------------------------------------------------------------------------------|
| Surface Soil    | Handheld soil moisture device | 0–10                            | Monthly             | -                                                                                   |
| Subsurface Soil | Permanently installed probes  | Forest & Grassland: 20, 60, 100 | 15-minute intervals | Lower soil (10–30 cm): 20 cm<br>Deeper soil (30–100 cm): mean(60 cm, 100 cm)        |
|                 |                               | Agroforestry: 20, 40, 80        |                     | Lower soil (10–30 cm): 20 cm<br>Deeper soil (30–100 cm): mean(40 cm, 80 cm)         |
|                 |                               | Cropland: 15, 40, 60, 100       |                     | Lower soil (10–30 cm): 15 cm<br>Deeper soil (30–100 cm): mean(40 cm, 60 cm, 100 cm) |

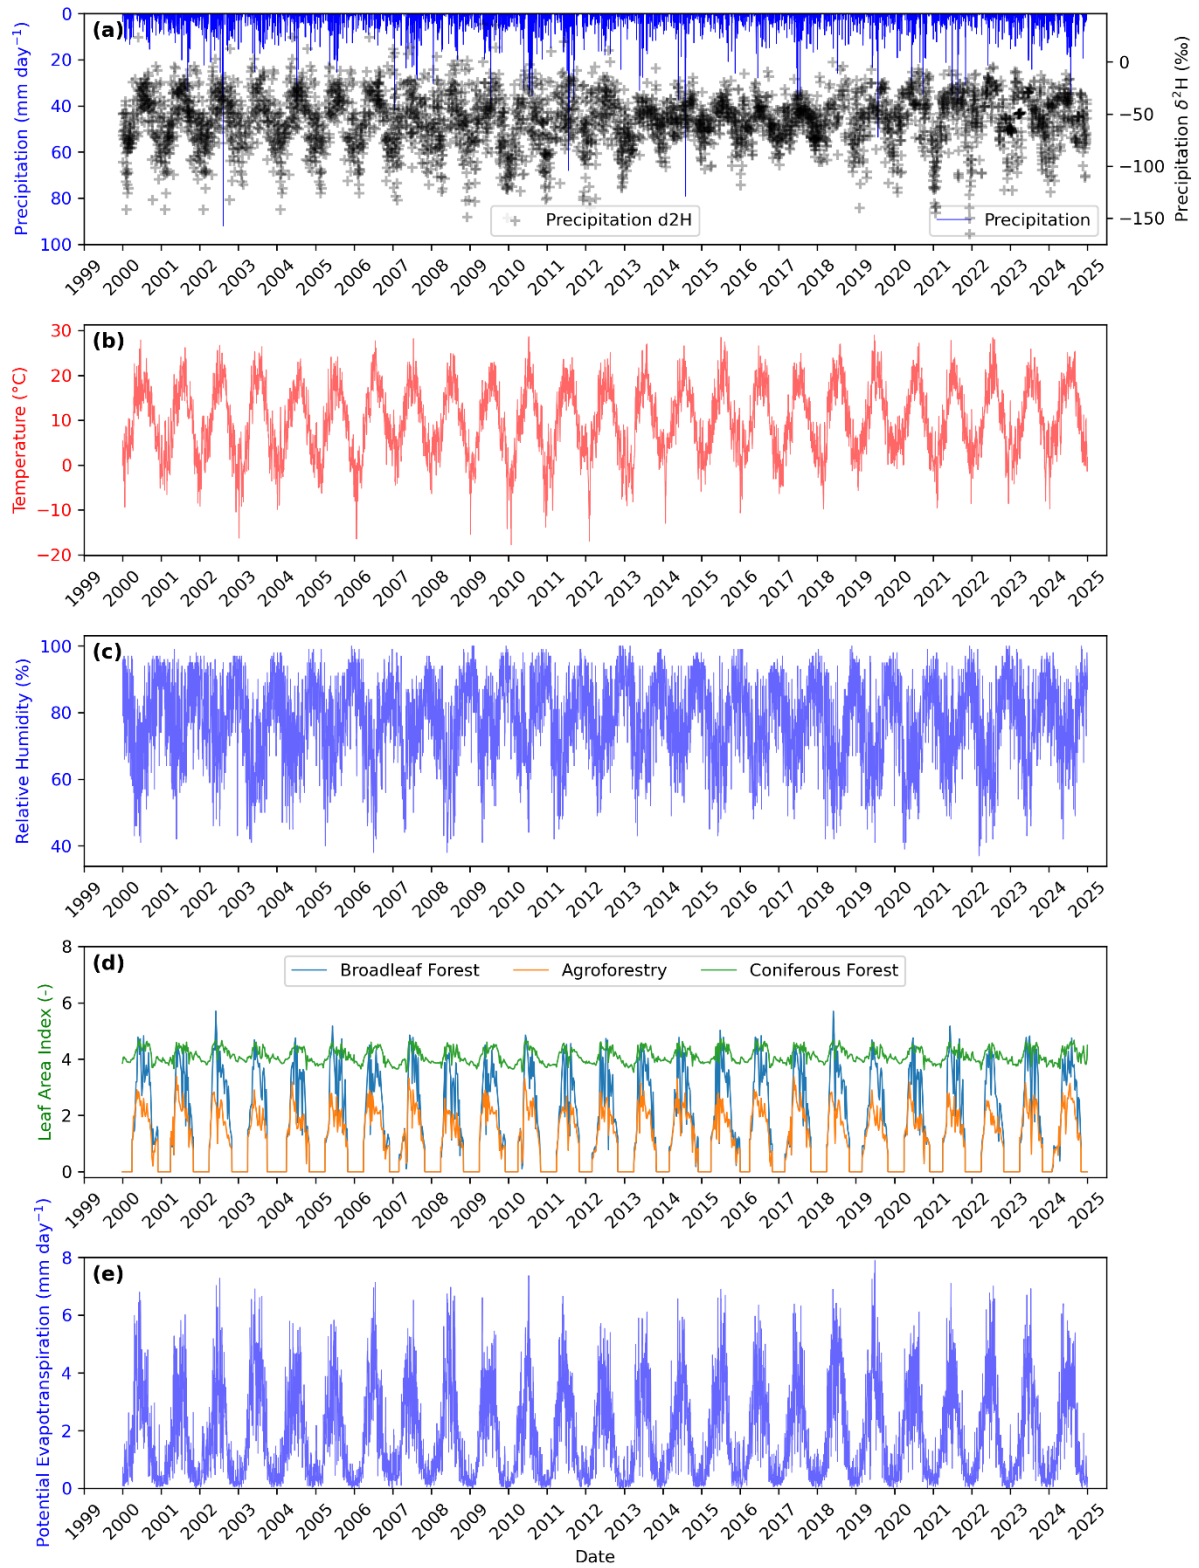

**Figure S2.** Input data for EcoPlot-iso long-term simulations (2000–2024) in the Demnitzer MillCreek Catchment: (a) Daily precipitation (mm day<sup>-1</sup>) and precipitation  $\delta^2\text{H}$  (‰); (b) Air temperature (°C); (c) Relative humidity (%); (d) Leaf Area Index (LAI); (e) Potential evapotranspiration (PET) (mm day<sup>-1</sup>).

13 **Table S2.** EcoPlot-iso parameters and initial ranges for calibration. BF: Broadleaf Forest, GL:  
14 Grassland, CL: Cropland, AF: Agroforest.

| Parameter     | Description                                                              | Sites | Initial range | Calibrated range |
|---------------|--------------------------------------------------------------------------|-------|---------------|------------------|
| $rE$          | Radiation extinction factor (dimensionless)                              | BF    | [-0.6, -0.1]  | [-0.6, -0.1]     |
|               |                                                                          | GL    |               | [-0.6, -0.1]     |
|               |                                                                          | AF    |               | [-0.6, -0.1]     |
|               |                                                                          | CL    |               | [-0.6, -0.1]     |
| $\alpha$      | Interception storage capacity parameter (mm per unit of LAI)             | BF    | [0.1, 2.0]    | [0.1, 2.0]       |
|               |                                                                          | GL    |               | [0.1, 2.0]       |
|               |                                                                          | AF    |               | [0.1, 2.0]       |
|               |                                                                          | CL    |               | [0.1, 2.0]       |
| $S_{max}$     | Maximum soil moisture content in the upper soil compartment (mm)         | BF    | [40, 60]      | [40, 60]         |
|               |                                                                          | GL    |               | [40, 60]         |
|               |                                                                          | AF    |               | [40, 60]         |
|               |                                                                          | CL    |               | [40, 60]         |
| $I_c$         | Soil infiltration capacity (mm/day)                                      | BF    | [40, 60]      | [40, 60]         |
|               |                                                                          | GL    |               | [40, 60]         |
|               |                                                                          | AF    |               | [40, 60]         |
|               |                                                                          | CL    |               | [40, 60]         |
| $ks1$         | Saturated hydraulic conductivity of the upper soil compartment (mm/day)  | BF    | [1, 20]       | [1, 20]          |
|               |                                                                          | GL    |               | [1, 20]          |
|               |                                                                          | AF    |               | [1, 20]          |
|               |                                                                          | CL    |               | [1, 20]          |
| $ks2$         | Saturated hydraulic conductivity of the lower soil compartment (mm/day)  | BF    | [1, 20]       | [1, 20]          |
|               |                                                                          | GL    |               | [1, 20]          |
|               |                                                                          | AF    |               | [1, 20]          |
|               |                                                                          | CL    |               | [1, 20]          |
| $ks3$         | Saturated hydraulic conductivity of the deeper soil compartment (mm/day) | BF    | [1, 20]       | [1, 20]          |
|               |                                                                          | GL    |               | [1, 20]          |
|               |                                                                          | AF    |               | [1, 20]          |
|               |                                                                          | CL    |               | [1, 20]          |
| $GW_{max}$    | Maximum soil moisture content in the lower soil compartment (mm)         | BF    | [50, 100]     | [50, 100]        |
|               |                                                                          | GL    |               | [50, 100]        |
|               |                                                                          | AF    |               | [50, 100]        |
|               |                                                                          | CL    |               | [50, 100]        |
| $L_{max}$     | Maximum soil moisture content in the deeper soil compartment (mm)        | BF    | [150, 450]    | [150, 350]       |
|               |                                                                          | GL    |               | [150, 350]       |
|               |                                                                          | AF    |               | [250, 450]       |
|               |                                                                          | CL    |               | [250, 450]       |
| $g1$          | Nonlinear scaling parameter for the upper soil compartment               | BF    | [1, 5]        | [1, 5]           |
|               |                                                                          | GL    |               | [1, 5]           |
|               |                                                                          | AF    |               | [1, 5]           |
|               |                                                                          | CL    |               | [1, 5]           |
| $g2$          | Nonlinear scaling parameter for the lower soil compartment               | BF    | [1, 5]        | [1, 5]           |
|               |                                                                          | GL    |               | [1, 5]           |
|               |                                                                          | AF    |               | [1, 5]           |
|               |                                                                          | CL    |               | [1, 5]           |
| $g3$          | Nonlinear scaling parameter for the deeper soil compartment              | BF    | [1, 5]        | [1, 5]           |
|               |                                                                          | GL    |               | [1, 5]           |
|               |                                                                          | AF    |               | [1, 5]           |
|               |                                                                          | CL    |               | [1, 5]           |
| $PFS_{scale}$ | Preferential flow path parameter (dimensionless)                         | BF    | [0.1, 0.9]    | [0.1, 0.9]       |
|               |                                                                          | GL    |               | [0.1, 0.9]       |
|               |                                                                          | AF    |               | [0.1, 0.9]       |
|               |                                                                          | CL    |               | [0.1, 0.9]       |
| $IntSp$       | Passive interception storage mixing volume (mm)                          | BF    | [0.5, 1]      | [0.5, 1]         |
|               |                                                                          | GL    |               | [0.5, 1]         |
|               |                                                                          | AF    |               | [0.5, 1]         |
|               |                                                                          | CL    |               | [0.5, 1]         |
| $StoSo$       | Passive upper soil storage mixing volume (mm)                            | BF    | [1, 20]       | [1, 20]          |
|               |                                                                          | GL    |               | [1, 20]          |
|               |                                                                          | AF    |               | [1, 20]          |

|         |                                                                    |    |              |              |
|---------|--------------------------------------------------------------------|----|--------------|--------------|
|         |                                                                    | CL |              |              |
| $gwSp$  | Passive lower soil storage mixing volume (mm)                      | BF | [3, 40]      | [3, 40]      |
|         |                                                                    | GL |              | [3, 40]      |
|         |                                                                    | AF |              | [3, 40]      |
|         |                                                                    | CL |              | [3, 40]      |
| $lowSP$ | Passive deep soil storage mixing volume (mm)                       | BF | [10, 100]    | [10, 100]    |
|         |                                                                    | GL |              | [10, 100]    |
|         |                                                                    | AF |              | [10, 100]    |
|         |                                                                    | CL |              | [10, 100]    |
| $k$     | Seasonality factor in the Craig-Gordon model (dimensionless)       | BF | [0.25, 0.9]  | [0.25, 0.9]  |
|         |                                                                    | GL |              | [0.25, 0.9]  |
|         |                                                                    | AF |              | [0.25, 0.9]  |
|         |                                                                    | CL |              | [0.25, 0.9]  |
| $x$     | Water vapor mixing ratio in the Craig-Gordon model (dimensionless) | BF | [0.25, 0.75] | [0.25, 0.75] |
|         |                                                                    | GL |              | [0.25, 0.75] |
|         |                                                                    | AF |              | [0.25, 0.75] |
|         |                                                                    | CL |              | [0.25, 0.75] |
| $\beta$ | Root distribution factor (dimensionless)                           | BF | [0, 1.0]     | [0, 0]       |
|         |                                                                    | GL |              | [0, 1.0]     |
|         |                                                                    | AF |              | [0, 0]       |
|         |                                                                    | CL |              | [0, 1.0]     |

15

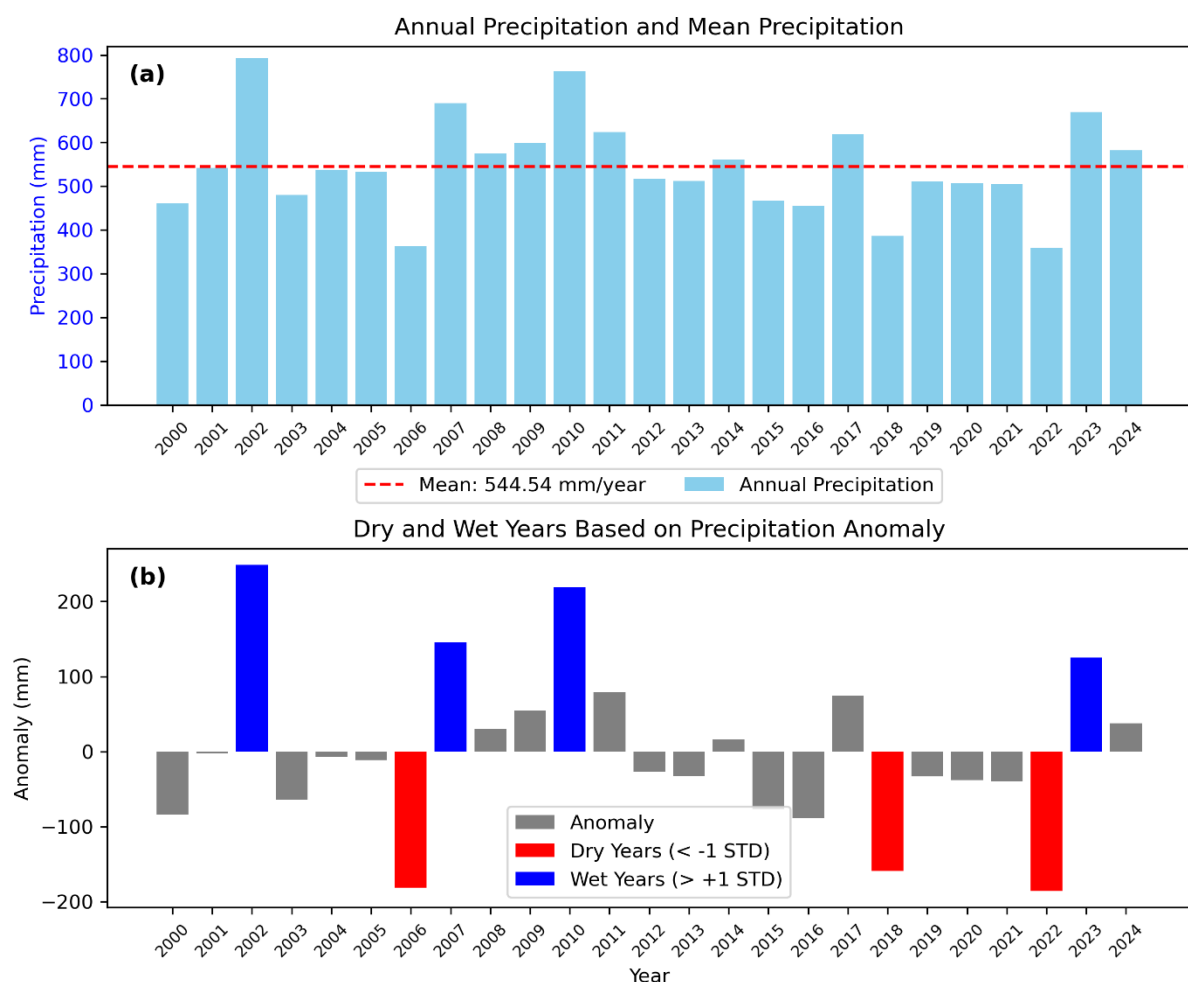

16

17 **Figure S3.** Annual precipitation and anomalies for the DMC. (a) Annual precipitation with the long-  
18 term mean (red dashed line). (b) Precipitation anomalies highlighting dry (red, anomaly < -1 standard  
19 deviation) and wet (blue, anomaly > +1 standard deviation) years.

20

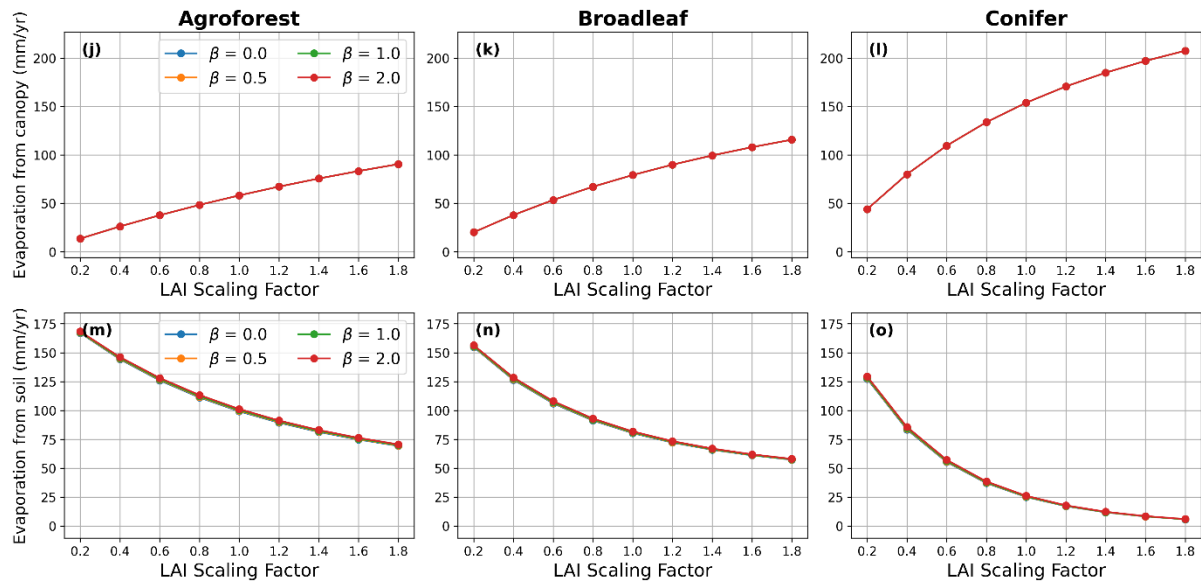

**Figure S4.** Annual mean evaporation components from (j)–(l) the canopy ( $E_i$ ) and (m)–(o) the soil surface ( $E_s$ ) across different forest types (Agroforest, Broadleaf, Conifer) and LAI scaling factors. Lines indicate results for different forest age classes ( $\beta$  values).

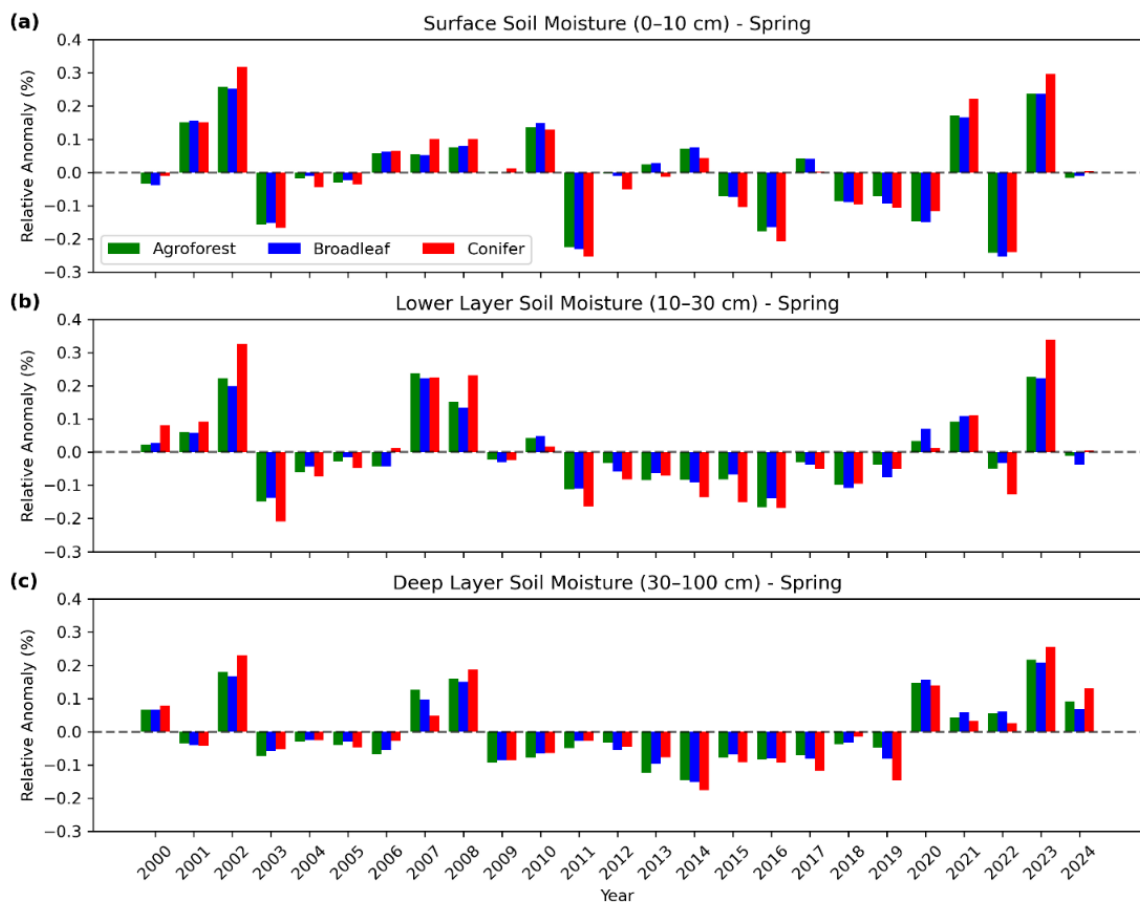

**Figure S5.** Relative soil moisture anomalies for spring (March–May) across three soil layers: (a) surface (0–10 cm), (b) lower layer (10–30 cm), and (c) deep layer (30–100 cm) for three forest types (Agroforest, Broadleaf, Conifer).

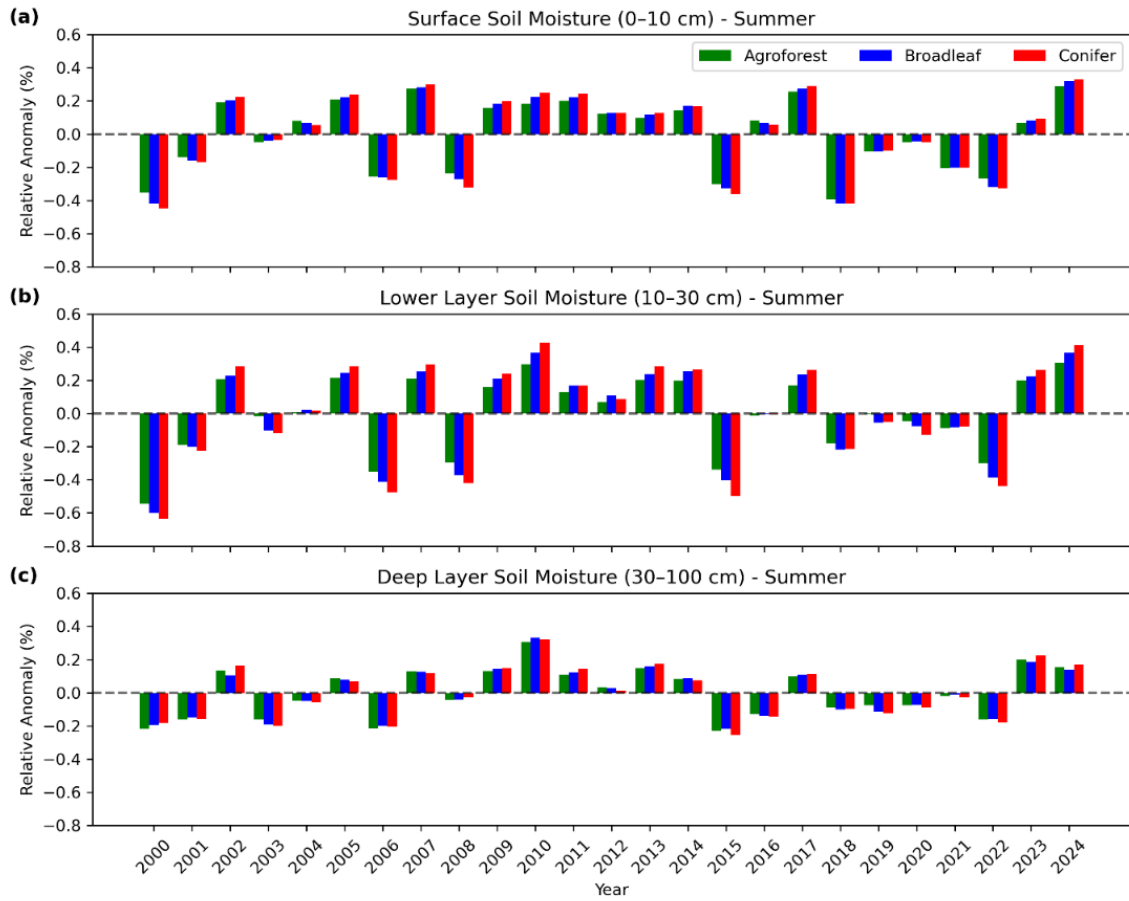

**Figure S6.** Same as Figure 11 but for forests with a shallow root system (root parameter  $\beta = 2.0$ ).

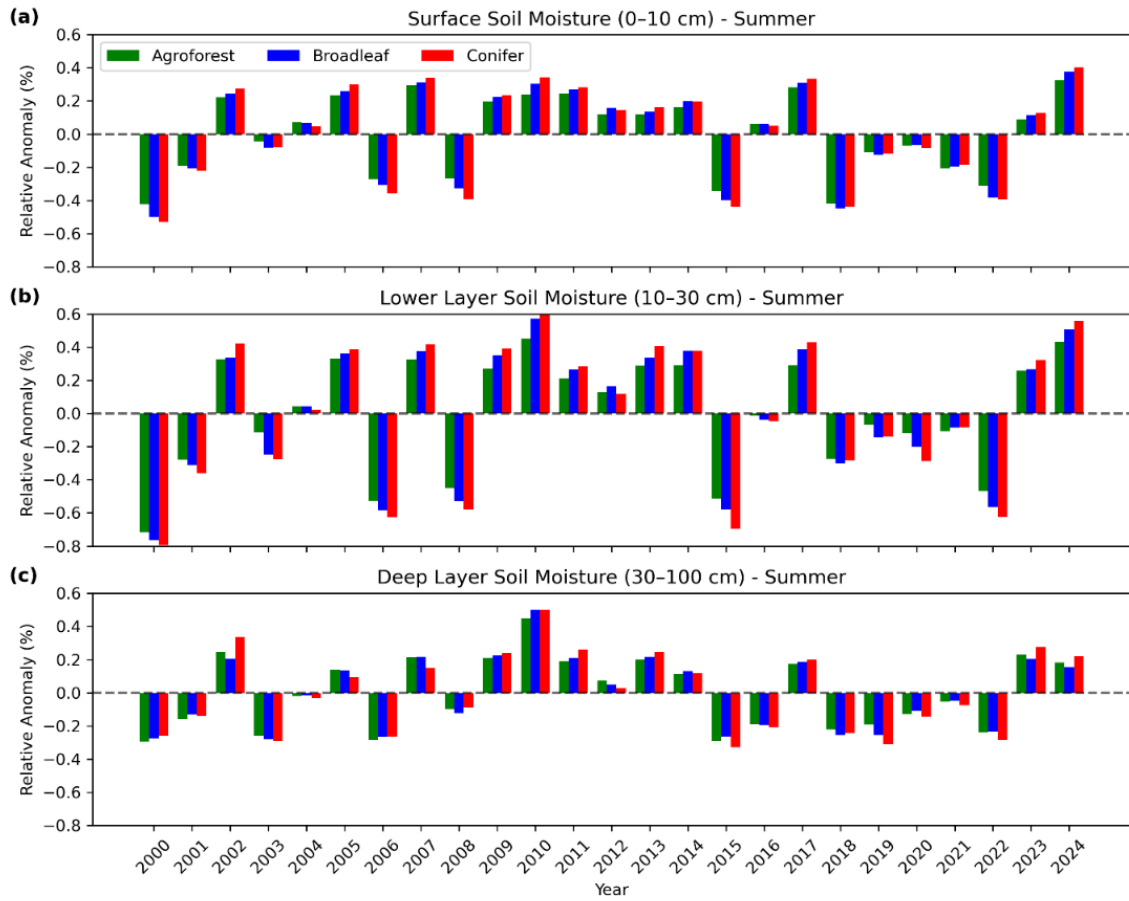

**Figure S7.** Same as Figure 11 but for forests with a higher density (LAI scaling factor = 1.6).
